## CORRECTION

# Correction: Pervasive within-host recombination and epistasis as major determinants of the molecular evolution of the foot-and-mouth disease virus capsid

Luca Ferretti, Eva Pérez-Martín, Fuquan Zhang, François Maree, Lin-Mari de Klerk-Lorist, Louis van Schalkwyk, Nicholas D. Juleff, Bryan Charleston, Paolo Ribeca

The following information is missing from the Funding statement: Nicholas D. Juleff was funded by Wellcome Trust intermediate-level research fellowship 091726/Z/10/Z.

In the Population structure section of the Materials and Methods, a reference is omitted from the first sentence of the first paragraph.

The correct sentence is: SNV variants in the inoculum were called by SiNPLE (Ferretti et al, 2019) using an approximation of the Bayesian calling algorithm in Snape-pooled [41] suitable for high coverage.

The reference is: Ferretti L, Tennakoon C, Silesian A, Freimanis G, Ribeca P. SiNPLE: Fast and Sensitive Variant Calling for Deep Sequencing Data. *Genes* 2019, 10, 561.

## Reference

1. Ferretti L, Pérez-Martín E, Zhang F, Maree F, de Klerk-Lorist L-M, van Schalkwyk L, et al. (2020) Pervasive within-host recombination and epistasis as major determinants of the molecular evolution of the foot-and-mouth disease virus capsid. *PLoS Pathog* 16(1): e1008235. <https://doi.org/10.1371/journal.ppat.1008235> PMID: 31905219

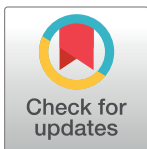

## OPEN ACCESS

**Citation:** Ferretti L, Pérez-Martín E, Zhang F, Maree F, de Klerk-Lorist L-M, van Schalkwyk L, et al. (2020) Correction: Pervasive within-host recombination and epistasis as major determinants of the molecular evolution of the foot-and-mouth disease virus capsid. *PLoS Pathog* 16(10): e1009050. <https://doi.org/10.1371/journal.ppat.1009050>

**Published:** October 28, 2020

**Copyright:** © 2020 Ferretti et al. This is an open access article distributed under the terms of the [Creative Commons Attribution License](https://creativecommons.org/licenses/by/4.0/), which permits unrestricted use, distribution, and reproduction in any medium, provided the original author and source are credited.
